# Supplementary material for: Climate-Sensitive Growth and Yield Models and Their Application to Assisted Migration
Source: Research Square preprint supplement (doi:10.21203/rs.3.rs-3627309/v1), 2023-11-21
Supplement: Supplementary file 1 [file 405366abc12d3e43a3d3dccc.docx]

# Appendix

**Table A1** Annual **c**limate variables, including abbreviation and units, used to develop transfer functions to assess local adaptation in this analysis.

| Variable abbreviation | Climate variable | Unit |
| --- | --- | --- |
| AHM | Annual heat-moisture index | ℃ mm-1 |
| CMD | Hargreaves climatic moisture deficit | mm |
| DD_0 | Degree-days below 0 ℃ | ℃ days |
| DD5 | Degree-days above 5 ℃ | ℃ days |
| Eref | Hargreaves reference evaporation | mm |
| EMT | Extreme minimum temperature over 30 years | ℃ |
| EXT | Extreme maximum temperature over 30 years | ℃ |
| FFP | Frost-free period | day |
| NFFP | The number of frost-free days | days |
| bFFP | The day of the year on which FFP begins | day |
| eFFP | The day of the year on which FFP ends | day |
| MAP | Mean annual precipitation | mm |
| MAT | Mean annual temperature | ℃ |
| MCMT | Mean coldest month temperature | ℃ |
| MWMT | mean warmest month temperature | ℃ |
| MAR | mean annual solar radiation | MJ m‐2 d‐1 |
| MSP | Mean summer precipitation | mm |
| CMI | Hogg’s climate moisture index | mm |
| PAS | Precipitation as snow | mm |
| RH | Mean annual relative humidity | % |
| SHM | Summer heat-moisture index | ℃ mm-1 |
| TD | Temperature difference (continentality; MWMT-MCMT) | ℃ |

**Table A2** Parameter estimates of the selected Universal Response Functions (URFs) for lodgepole pine and white spruce

| Variable | Parameter estimate | p_value | Partial *R*2 |  | Variable | Parameter estimate | p_value | Partial *R*2 |
| --- | --- | --- | --- | --- | --- | --- | --- | --- |
| Lodgepole pine |  |  |  |  | White spruce |  |  |  |
| Intercept | -2.853000 | <0.001 |  |  | Intercept | -59.360000 | <0.001 |  |
| MAT.p2 | -0.005774 | <0.001 | 0.069 |  | AHM.p | -0.710200 | <0.001 | 0.039 |
| TD.p | 0.048300 | <0.001 | 0.005 |  | AHM.p2 | -0.001835 | <0.001 | 0.019 |
| TD.p2 | -0.002111 | <0.001 | 0.082 |  | NFFD.p | 0.025340 | <0.001 | 0.029 |
| CMD.p2 | -0.000003 | <0.001 | 0.025 |  | NFFD.p2 | -0.000102 | <0.001 | 0.018 |
| MCMT.s | -0.154400 | <0.001 | 0.069 |  | Eref.p | 0.091070 | <0.001 | 0.001 |
| MCMT.s2 | -0.008370 | <0.001 | 0.032 |  | Eref.p2 | -0.000005 | <0.001 | 0.006 |
| DD5.s | 0.004286 | <0.001 | 0.085 |  | MAP.s | 0.087060 | <0.001 | 0.232 |
| DD5.s2 | -0.000002 | <0.001 | 0.042 |  | MAP.s2 | -0.000036 | <0.001 | 0.144 |
| PAS.s | 0.002537 | <0.001 | 0.011 |  | SHM.s | 0.460300 | <0.001 | 0.046 |
| PAS.s2 | -0.000003 | <0.001 | 0.009 |  | SHM.s2 | -0.001124 | <0.001 | 0.001 |
| MCMT.s:MAT.p | 0.004568 | <0.001 | 0.001 |  | FFP.s | 0.103700 | <0.001 | 0.002 |
| TD.p:MCMT.s | -0.003742 | <0.001 | 0.060 |  | FFP.s2 | -0.000812 | <0.001 | 0.030 |
| CMD.p:MCMT.s | 0.000169 | <0.001 | 0.023 |  | AHM.p:MAP.s | 0.001109 | <0.001 | 0.004 |
| DD5.s:MAT.p | 0.000112 | <0.001 | 0.005 |  | AHM.p:SHM.s | 0.008649 | <0.001 | 0.010 |
| TD.p:DD5.s | 0.000042 | <0.001 | 0.004 |  | AHM.p:FFP.s | -0.001704 | <0.001 | 0.003 |
| CMD.p:DD5.s | -0.000001 | <0.001 | 0.003 |  | Eref.p:MAP.s | -0.000116 | <0.001 | 0.044 |

Note: p and s refer to provenance and site; full names of each climate variables are listed in Table A1


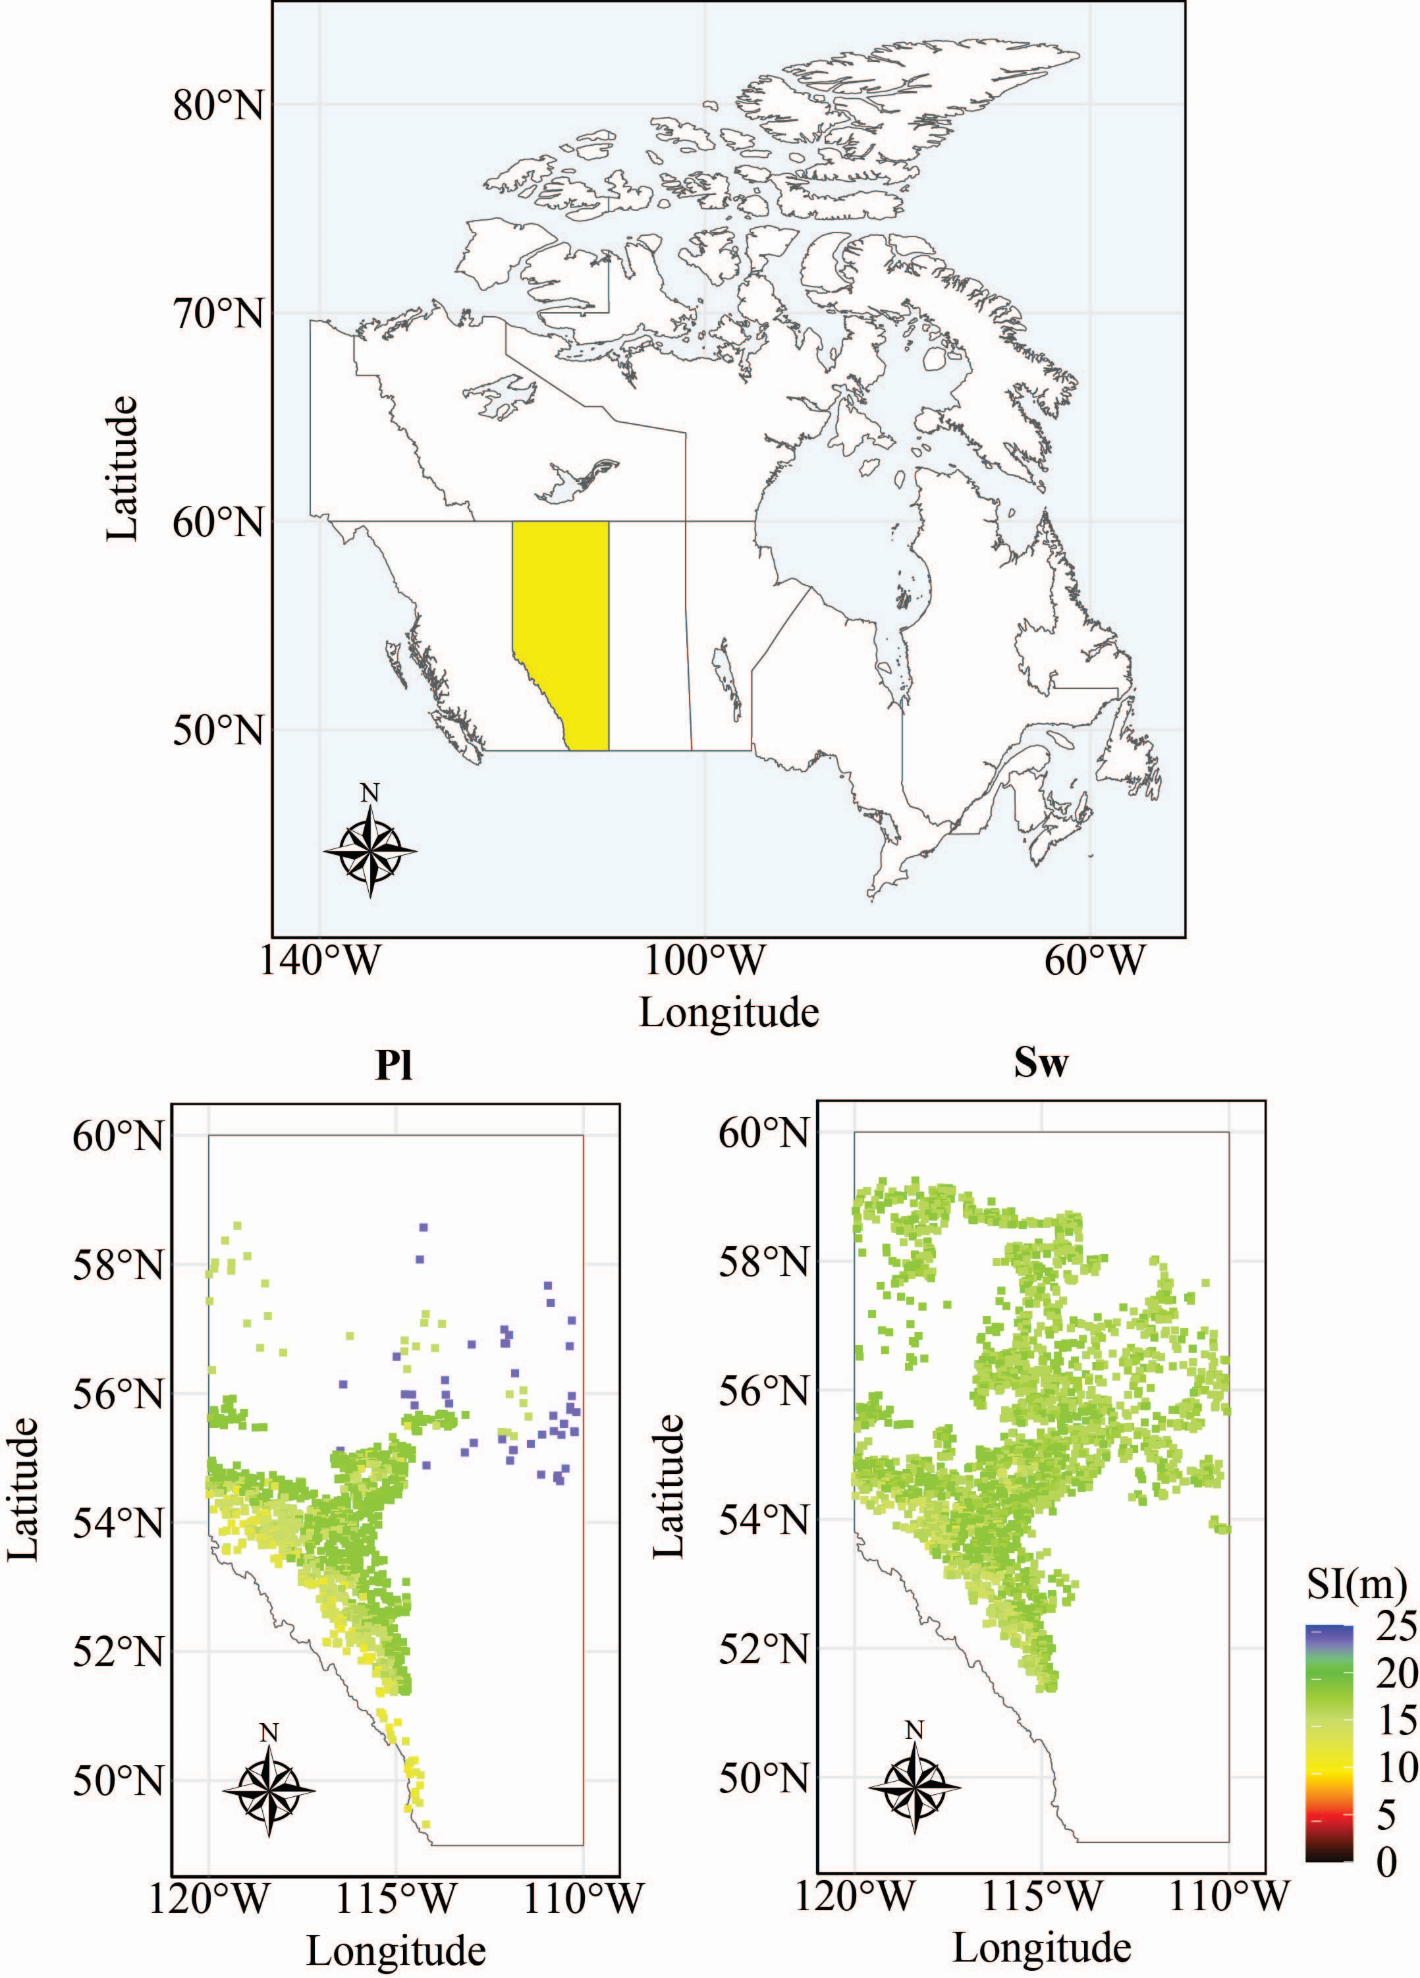


**Fig. A1** Maps of Canada showing Alberta in yellow (top), and site index estimates (SI, m) for lodgepole pine (Pl, bottom left) and white spruce (Sw, bottom right) in Alberta based on Derived Ecological Phase (DEP, v2.0) digital map from Alberta government open data [Derived Ecosite Phase v2.0 - Open Government (alberta.ca)](https://open.alberta.ca/opendata/gda-ae37f83c-c994-47a9-b2f0-39ba1da0e64c#summary)


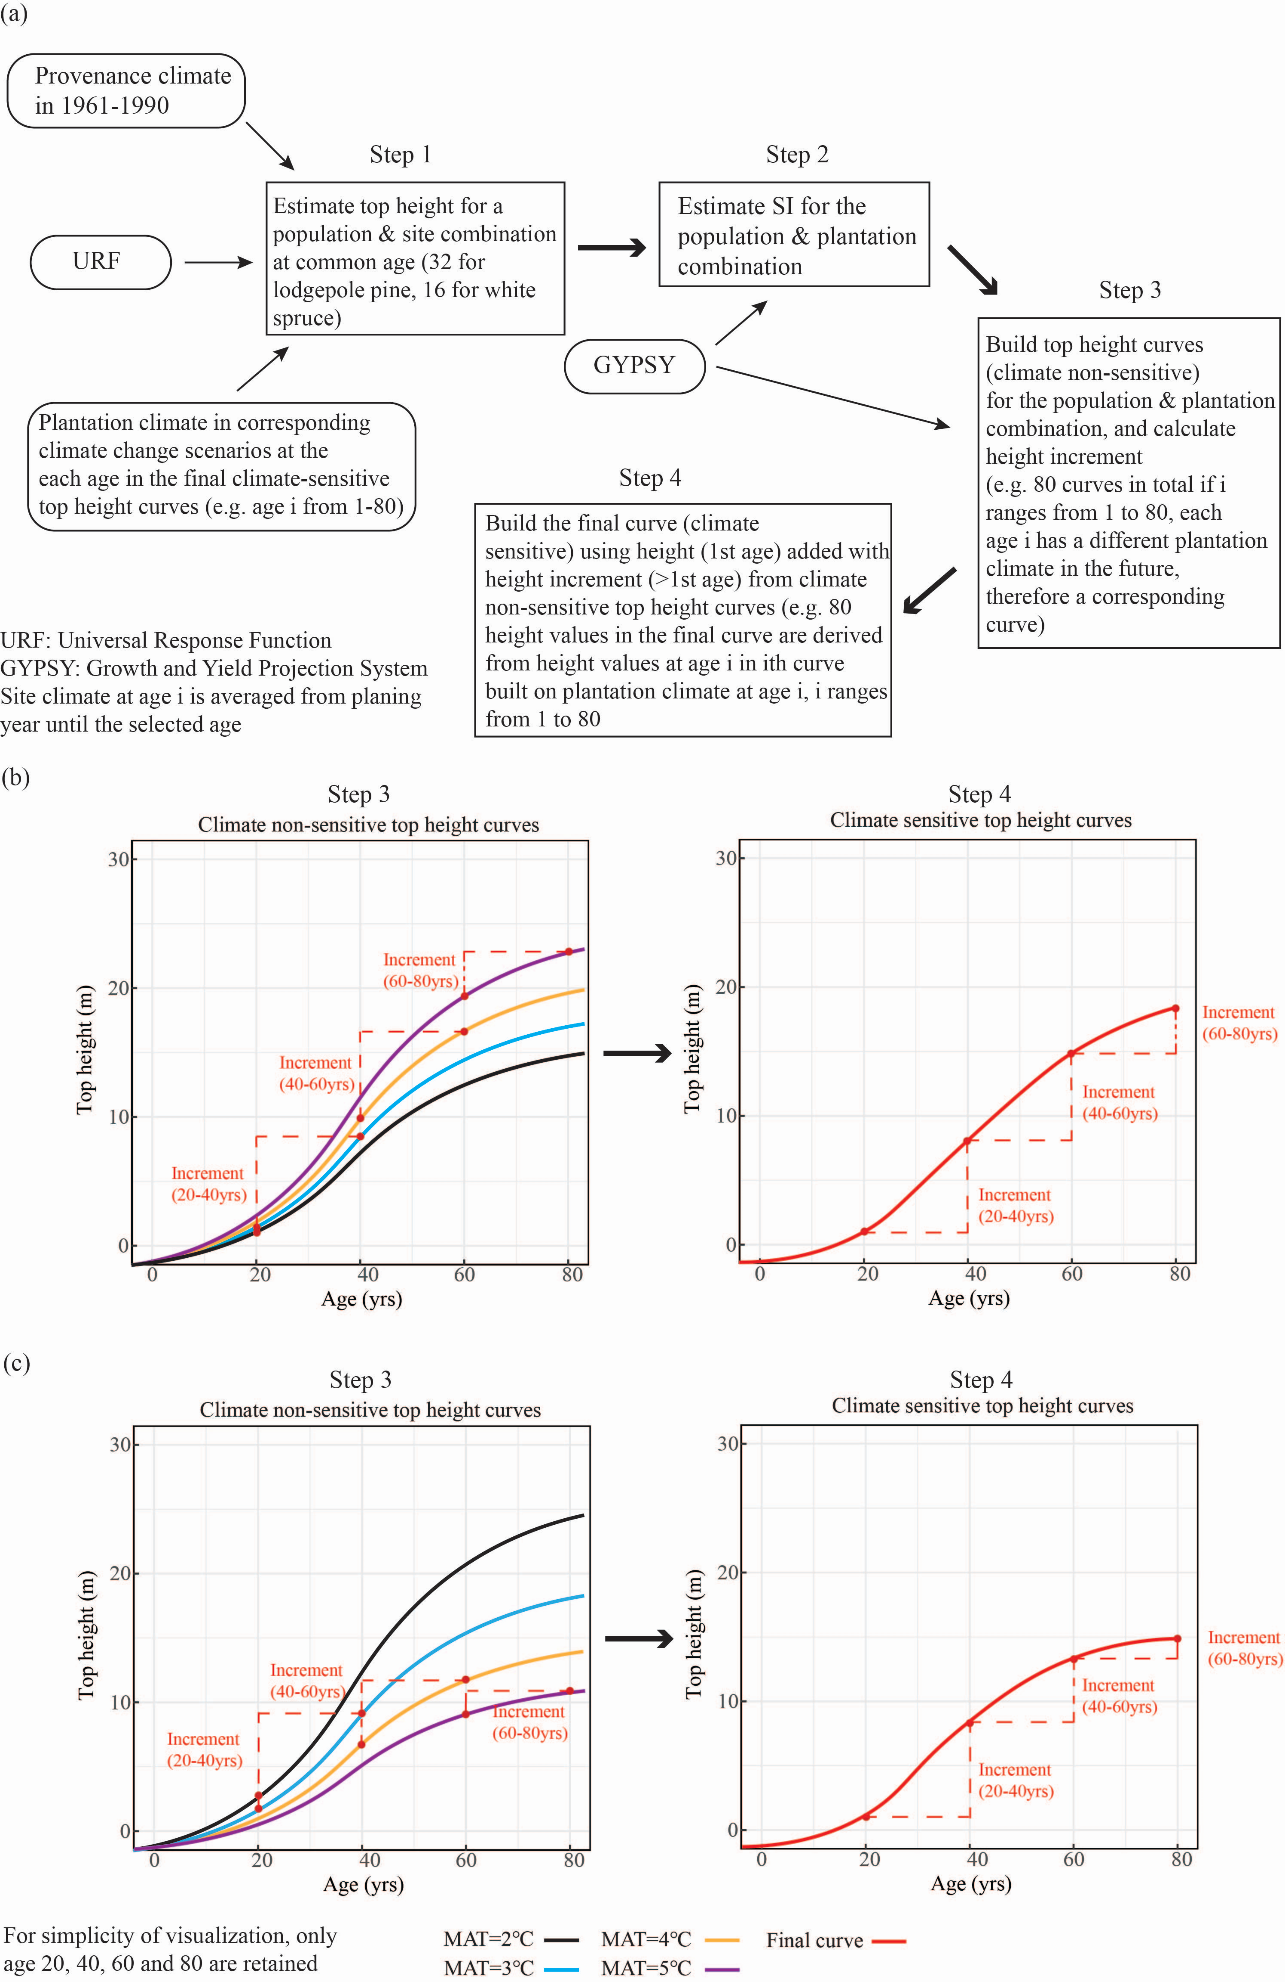


**Fig. A2** Flow chart for building a climate-sensitive growth and yield model (a); climate-sensitive and non-sensitive top height curves in the case of increasing top height (b) and decreasing top height (c) under climate change scenarios


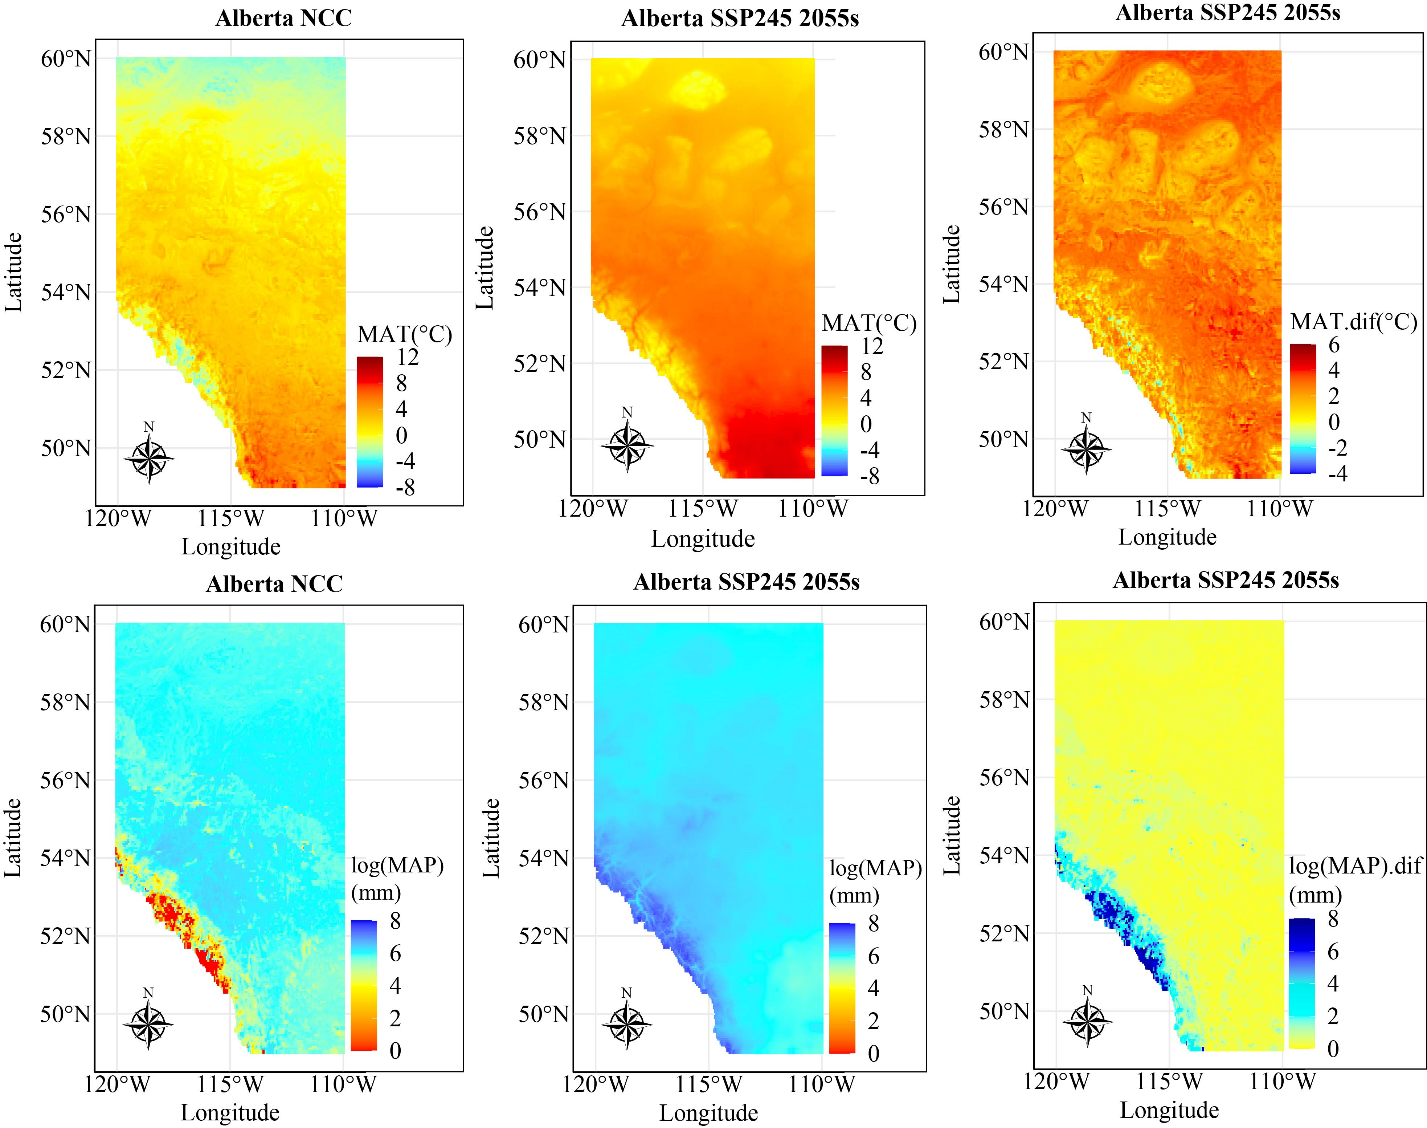


**Fig. A3** Mean annual temperature (MAT), log mean annual precipitation (MAP) and their change (dif) in Alberta under no climate change (NCC) and under Shared Socioeconomic Pathway (SSP) 245 in the 2055s (averaged over 2041-2070)
